# Supplementary material for: eRNA profiling uncovers the enhancer landscape of oesophageal adenocarcinoma and reveals new deregulated pathways
Source: bioRxiv preprint, doi:10.1101/2022.05.11.491502, version 1 (2022-05-11)
Supplement: Supplementary Table 10 [file 491502_file12.xlsx]

## Sheet: Legend
Table S10
10 genes within a 100 kb distance of an eRNA region whose expression is most correlated by Spearmans rank.

## Sheet: Correlations
eRNA region	Gene	Distance to eRNA (bp)	Spearmans r
chr2_88857276_88857779	IGKC	-155	0.999
	IGKV4-1	-27869	0.925
	IGKJ4	-3394	0.829
	IGKJ1	-4395	0.822
	ANKRD36BP2	91721	0.818
	IGKJ5	-3077	0.761
	IGKJ3	-3730	0.759
	IGKV1-5	-90429	0.577
	MIR4436A	45158	0.248
	AC244205.2	32321	0.196
	IGKV7-3	-57850	0.114
	IGKV5-2	-39704	0.035
chr4_9532073_9532720	AC097493.4	-33	0.998
	AC097493.2	-30775	0.668
	SNRPCP13	-51735	0.559
	MIR548I2	-23920	0.536
	AC097493.1	-21589	0.509
	DEFB131A	87862	0.18
	UNC93B7	38660	0.152
	OR7E85P	48678	0.084
	OR7E84P	63422	0.067
	AC097493.3	10486	0.033
	OR7E86P	73141	0.013
	OR7E83P	19491	-0.005
chr1_146409574_146410075	RNVU1-25	-79	0.997
	AC245407.2	22622	0.372
	RNVU1-29	33017	0.35
	SEC22B4P	8177	0.187
	PPIAL4H	65034	0.108
	AC245407.1	-49625	0.089
	HYDIN2	-62742	0.007
chr1_145465251_145465819	RNVU1-31	-245	0.997
	AC239860.4	-10071	0.146
	NBPF20	59757	0.138
	AC239860.1	-43512	0.07
	AC239860.3	5737	0.064
	RNU1-154P	33842	0.006
	PFN1P3	57763	-0.011
chr11_71639157_71639860	AP000867.4	-43	0.995
	ENPP7P8	-72232	0.813
	RPS3AP41	-30012	0.695
	SNRPCP14	-51149	0.5
	AP003498.2	-65896	0.477
	UNC93B6	36248	0.275
	KRTAP5-9	91090	0.201
	KRTAP5-11	36155	0.183
	OR7E87P	46054	0.173
	KRTAP5-10	73945	0.168
	OR7E4P	19488	0.151
	AP000867.1	70828	0.134
	AP000867.5	73900	0.067
	AP000867.3	10463	0.04
chr9_40105761_40106262	AL773545.3	190	0.995
	C2orf27AP3	-15950	0.336
	AL772307.1	-599	0.132
	FGF7P3	-649	0.095
	AL773545.1	-24909	0.033
	MEP1AP1	-87909	0.015
chr9_61330463_61330964	CNTNAP3C	-3	0.993
	BX005040.1	98851	0.068
	RN7SL462P	-97163	-0.013
chr1_148522372_148522984	RNVU1-27	77	0.992
	AC245100.8	63864	0.146
	AC245100.2	87573	0.135
	PPIAL4G	38999	0.095
	LINC01138	3074	0.056
chr3_130002794_130003436	AC083906.5	108	0.99
	AC083906.3	33821	0.505
	TRH	28427	0.488
	ALG1L2	-78716	0.418
	AC083906.1	4584	0.399
	LINC02014	-91189	0.109
	OR7E129P	-19405	0.09
	AC083906.2	-10426	0.088
	OR7E21P	-32424	0.055
	AC083906.4	-52805	-0.037
chr17_43360851_43361352	AC109326.1	-259	0.986
	LINC00910	-28097	0.333
	CCDC200	55705	0.127
	MIR2117HG	-83605	0.104
	ARL4D	-37891	0.061
	RNU6-470P	-51325	0.051
	AC024051.4	70621	0.035
	RNU6-1137P	-34989	-0.027
	RNU6-406P	-84405	-0.079
chr12_55413398_55413899	PHC1P1	-1139	0.981
	OR6C71P	34851	0.081
	OR6C3	83605	0.071
	OR6C7P	70807	0.029
	OR6C75	50673	0.024
	OR6C76	-12606	0.021
	OR6C2	-30421	0.021
	OR6C73P	17308	0.007
	OR6C66P	27811	0.006
	OR6C70	-56490	0.002
	OR6C1	99305	0
	OR6C65	13218	-0.088
	OR6C68	-78730	-0.125
chrX_129677669_129678551	AL022162.1	-238	0.979
	XPNPEP2	-60864	0.199
	APLN	23154	-0.077
chr22_22758367_22758868	IGLV2-14	-82	0.977
	IGLV2-23	60829	0.844
	IGLV2-11	-33873	0.824
	IGLV3-21	46929	0.814
	IGLV2-8	-64040	0.802
	IGLV3-19	37995	0.798
	IGLV3-25	71892	0.792
	IGLV3-9	-60392	0.732
	IGLV3-10	-53129	0.698
	IGLV3-27	90330	0.638
	IGLV2-18	24011	0.631
	IGLV3-16	11235	0.597
	IGLV2-5	-98144	0.581
	IGLV2-28	94145	0.512
	IGLV3-12	-13206	0.434
	IGLV3-22	54353	0.371
	IGLV3-6	-91757	0.274
	IGLV3-24	64179	0.265
	IGLV3-13	-3676	0.25
	IGLV3-4	-99407	0.201
	AC244157.2	-28650	0.161
	IGLV3-7	-79984	0.084
	MIR650	-64158	0.08
	IGLVI-20	43328	0.056
	AC245028.1	-56053	0.052
	IGLV3-29	97319	0.036
	IGLV3-17	19674	0.022
	IGLV3-15	3064	0.013
	AC245028.3	-44458	0.01
	AC244250.1	65306	0.007
	AC245028.2	-76247	0
	AC244250.2	68787	-0.016
	AC244157.1	-15911	-0.02
	IGLV3-26	85466	-0.046
	IGLVVI-25-1	79521	-0.061
chr1_148263401_148263902	RNVU1-22	176	0.976
	RNVU1-21	-71115	0.59
	MIR5087	-70902	0.503
	LINC01731	-17097	0.349
	AC245100.3	-25299	0.327
	RNVU1-1	-98881	0.316
	LINC02806	-31528	0.273
	AC245100.1	-32243	0.246
	AC245100.7	-95034	0.232
	AC239809.1	29379	0.194
	AC239809.2	17483	0.149
	AC245100.5	-54361	0.11
	RNA5SP57	69936	0.02
	AC239809.3	8640	-0.001
chr1_155637355_155637856	AL353807.5	2	0.975
	AL353807.3	-22639	0.456
	YY1AP1	-51394	0.438
	MSTO1	27418	0.408
	ASH1L	74799	0.38
	ASH1L-AS1	75564	0.352
	AL353807.4	71300	0.327
	AL353807.1	46344	0.195
	AL162734.1	-72957	0.194
	DAP3P1	50962	0.151
	DAP3	-50354	0.119
	AL353807.2	27226	0.113
chr20_53942176_53942677	AC005220.1	2266	0.975
	SUMO1P1	66869	-0.047
chr20_49957477_49957978	KRT18P4	983	0.974
	SPATA2	42199	0.351
	SNAI1	-25252	0.187
	AL031685.2	24933	0.117
	AL031685.1	37034	0.1
	TRERNA1	-83776	0.094
	RNU6-147P	-14378	0.083
	RNF114	21392	0.045
chr1_241916160_241916661	RPL23AP20	287	0.971
	BECN2	-41357	0.362
	AL365366.1	84475	0.297
	EXO1	68443	0.14
	CFL1P4	-76775	0.044
	MAP1LC3C	-82688	-0.009
chr19_13838985_13839486	AC020916.1	-3692	0.97
	ZSWIM4	43776	0.46
	MRI1	74714	0.448
	AC020916.2	42303	0.44
	C19orf57	-67216	0.311
	CC2D1A	-66965	0.307
	RN7SL619P	23917	0.276
	NANOS3	-22827	0.24
	MIR181D	-35639	0.192
	MIR181C	-35463	0.108
	AC008686.1	65118	-0.087
	C19orf53	64780	-0.204
chr19_13840416_13840947	AC020916.1	-2246	0.97
	MRI1	76160	0.547
	ZSWIM4	45222	0.514
	AC020916.2	43749	0.429
	CC2D1A	-65519	0.429
	C19orf57	-65770	0.385
	RN7SL619P	25363	0.305
	NANOS3	-21381	0.262
	MIR181D	-34193	0.175
	MIR181C	-34017	0.085
	AC008686.1	66564	-0.09
	C19orf53	66226	-0.195
chr7_93591377_93591878	GNGT1	55	0.97
	AC002075.2	-78449	0.841
	CALCR	16898	0.604
chr19_3482935_3483436	AC005551.1	-260	0.969
	SMIM24	2661	0.643
	FZR1	-23087	0.505
	HMG20B	-89591	0.465
	DOHH	-17488	0.351
	C19orf71	-55968	0.341
	MFSD12	-91104	0.203
	AC005786.2	-74829	0.074
	AC005787.1	-38134	0.042
	AC005786.4	-84773	-0.008
	AC005786.1	-85087	-0.017
chr19_43329121_43329622	AC005392.2	-2058	0.967
	CD177	-24314	0.637
	TEX101	-72124	0.502
	CD177P1	-49751	0.421
	PSG9	59842	0.3
	AC005392.3	-39598	0.281
	CEACAMP4	24849	0.236
	CEACAMP10	80726	0.222
	CEACAMP11	45054	0.188
chr11_69985640_69986141	AP003555.2	14	0.966
	LINC02584	-89543	0.737
	AP003555.1	-35169	0.723
	ANO1	-92412	0.7
	LINC02753	-79481	0.675
	RNU6-1175P	-89473	0.37
	AP007216.1	74896	0.118
	AP007216.2	59077	-0.001
chr8_37598384_37598885	AC124067.4	-1224	0.964
	AC124067.3	38642	0.822
	AC124067.2	77187	0.654
	ZNF703	-97148	0.572
	LINC01605	44451	0.393
	AC137579.2	-27239	0.316
	AC137579.1	-75753	0.062
	RNU6-607P	-70264	-0.048
chr22_22720974_22721475	IGLV3-19	601	0.963
	IGLV2-14	-37476	0.825
	IGLV2-23	23435	0.797
	IGLV3-25	34498	0.785
	IGLV2-11	-71267	0.784
	IGLV3-21	9535	0.769
	IGLV3-10	-90523	0.69
	IGLV3-9	-97786	0.67
	IGLV3-27	52936	0.574
	IGLV2-18	-13383	0.552
	IGLV3-16	-26159	0.541
	IGLV2-28	56751	0.438
	IGLV3-12	-50600	0.357
	IGLV3-22	16959	0.352
	IGLV3-24	26785	0.241
	IGLV3-13	-41070	0.209
	AC244157.2	-66044	0.135
	BCRP4	91159	0.105
	AC245028.1	-93447	0.085
	IGLV3-17	-17720	0.05
	IGLVI-20	5934	0.047
	AC244157.1	-53305	0.03
	IGLV3-29	59925	0.017
	IGLV3-15	-34330	0
	GGTLC2	76749	-0.003
	AC245028.3	-81852	-0.007
	AC244250.1	27912	-0.02
	POM121L1P	76751	-0.022
	IGLVVI-25-1	42127	-0.03
	AC244250.4	87375	-0.031
	AC244250.2	31393	-0.033
	IGLV3-26	48072	-0.035
chr1_634513_635014	MTCO3P12	388	0.963
	MTATP6P1	1068	0.413
	MTND2P28	5124	0.369
	MTCO1P12	3690	0.316
	MTCO2P12	2007	0.272
	CICP3	-87328	0.151
	MTND1P23	5702	0.089
	WBP1LP6	-40078	0.01
	MTATP8P1	1229	0.003
	OR4F16	-51909	-0.017
chr16_63617334_63618381	AC138305.1	-188	0.962
	AC018846.1	-85625	-0.079
chr4_9000444_9001013	AC073648.6	-113	0.957
	AC073648.7	-76221	0.659
	AC073648.4	-29558	0.604
	AC073648.5	-20433	0.575
	SNRPCP16	-51323	0.543
	ENPP7P10	-78295	0.443
	AC073648.1	51098	0.197
	AC073648.3	19292	0.131
	AC073648.2	10273	0.099
	UNC93B8	41100	-0.025
chr12_126191052_126191760	AC007368.1	255	0.956
	AC005888.1	0	0.227
	AC005858.1	49454	0.024
	LINC02359	97294	-0.042
	AC005858.3	60541	-0.084
chr11_71745726_71746227	AP003498.3	645	0.956
	ENPP7P8	34236	0.705
	RPS3AP41	76456	0.63
	SNRPCP14	55319	0.51
	AP003498.2	40572	0.505
	AP003498.1	-72262	0.386
	FAM86C1	-41534	0.084
	ZNF705E	-75572	0.07
	ALG1L9P	-58664	0.036
	DEFB108B	-87224	0.028
	RNA5SP342	-99269	0.002
chr10_47991681_47992182	AC245041.2	55	0.955
	AC245041.1	18436	0.879
	FAM25C	-7859	0.406
	AGAP12P	-39708	0.101
	NPY4R2	73193	0.075
	BMS1P7	-68084	0.034
	RNA5SP315	-48530	0.001
chr19_13839529_13840030	AC020916.1	-3148	0.955
	MRI1	75258	0.469
	ZSWIM4	44320	0.462
	AC020916.2	42847	0.439
	CC2D1A	-66421	0.359
	C19orf57	-66672	0.34
	RN7SL619P	24461	0.277
	NANOS3	-22283	0.27
	MIR181D	-35095	0.151
	MIR181C	-34919	0.06
	AC008686.1	65662	-0.067
	C19orf53	65324	-0.193
chr8_66113074_66114389	AC084082.1	1065	0.955
	TRIM55	-13164	0.059
	LINC00967	-78361	0.029
	CRH	-64732	0.025
	DNAJC5B	92179	-0.103
chr19_13841378_13841879	AC020916.1	-1300	0.954
	ZSWIM4	46168	0.505
	MRI1	77106	0.487
	AC020916.2	44695	0.439
	CC2D1A	-64573	0.384
	C19orf57	-64824	0.352
	NANOS3	-20435	0.28
	RN7SL619P	26309	0.266
	MIR181D	-33247	0.178
	MIR181C	-33071	0.118
	AC008686.1	67510	-0.066
	C19orf53	67172	-0.142
chr15_97295931_97296432	LINC02253	80370	0.952
	AC020704.1	-23139	0.842
	RN7SL677P	-57315	0.816
chr15_72155244_72155745	AC020779.2	35	0.95
	AC020779.1	20853	0.369
	GRAMD2A	-42293	0.368
	SENP8	41236	0.325
	MYO9A	36917	0.231
	PKM	-76328	-0.167
chr5_104079796_104080297	LINC02163	199	0.949
	RNU1-140P	-18828	0.388
chr11_119919610_119920111	AP001994.3	27160	0.946
	AP001994.2	86894	0.054
	AP001360.1	-93760	0.042
	AP001994.1	97731	0.039
	AP001360.3	-56251	-0.007
	LINC02744	-75177	-0.007
chr7_30176522_30177023	AC007036.1	-2242	0.944
	AC007036.2	35902	0.566
	RPS27P16	8968	0.528
	MTURN	41786	0.487
	AC007036.5	42058	0.264
	AC007036.4	60778	0.053
chr17_48636429_48636930	AC103702.2	-10343	0.943
	HOXB-AS4	8005	0.768
	MIR196A1	4121	0.744
	LINC02086	-10243	0.687
	HOXB9	10322	0.644
	HOXB-AS3	87050	0.554
	HOXB6	31688	0.554
	HOXB5	42719	0.531
	HOXB8	21388	0.529
	AC103702.1	54421	0.507
	HOXB3	31768	0.449
	RPL9P28	-55014	0.426
	HOXB7	3108	0.417
	HOXB13	-92498	0.388
	HOXB-AS2	79418	0.375
	HOXB-AS1	93129	0.347
	HOXB4	58330	0.339
	HOXB2	91691	0.301
	AC091179.2	-53944	0.261
	PRAC2	-86505	0.232
	AC091179.1	-96411	0.201
	COX6B1P2	-77050	0.088
	PRAC1	-85838	0.068
	AC091179.4	-87012	-0.024
chr2_95525587_95526118	AC009237.14	-850	0.943
	AC009237.3	507	0.732
	AC009237.8	-10643	0.698
	AC009237.15	-12117	0.576
	TRIM64FP	11025	0.325
	OR7E102P	-20679	0.322
	AC009237.5	-17378	0.291
	AC009238.2	91093	0.199
	AC009238.1	89719	0.16
	TRIM43B	41121	0.111
	AC009237.11	40311	0.078
	TRIM51JP	-49049	0.056
	TRIM43	-66149	0.047
	AC009237.1	37225	0
	AC009237.10	29321	0
	AC009237.2	23061	0
	AC009237.4	-65354	0
chr14_28317975_28318476	AL139023.1	85	0.942
	BNIP3P1	53836	0.158
chr11_71721815_71722316	ENPP7P8	10326	0.942
	AP000867.4	82515	0.814
	RPS3AP41	52546	0.761
	AP003498.3	-23265	0.728
	SNRPCP14	31409	0.625
	AP003498.2	16662	0.62
	AP003498.1	-96172	0.523
	ZNF705E	-99482	0.16
	ALG1L9P	-82574	0.059
	AP000867.3	93021	0.047
	FAM86C1	-65444	-0.022
chr12_51814371_51814872	TMDD1	-304	0.941
	FIGNL2	-34144	0.573
	AC068987.2	-421	0.453
	FIGNL2-DT	-33601	0.232
	ACVRL1	-92286	0.189
	AC025259.2	-85943	0.07
	ANKRD33	-73387	0.039
chr8_29055962_29056463	AC108449.2	277	0.94
	AC108449.1	-54361	0.444
	RNA5SP260	7608	0.303
chr19_20221547_20222048	AC011447.7	-388	0.94
	BNIP3P17	-71	0.846
	AC011447.6	12009	0.809
	AC011447.3	-99507	0.771
	AC011447.4	14844	0.681
	ZNF486	54584	0.591
	BNIP3P16	44735	0.485
	AC011447.2	69890	0.321
	BNIP3P15	84865	0.264
	AC078899.3	-27254	0.111
	AC078899.4	-73291	0.094
	BNIP3P18	-46019	0.07
	AC078899.1	-35922	0.058
chr1_76700105_76700606	TPI1P1	567	0.939
	LINC02567	-78911	0.085
	AC104458.1	63479	0.008
chr1_146387060_146387561	AC245407.2	108	0.939
	RNVU1-29	10503	0.531
	RNVU1-25	-22593	0.406
	SEC22B4P	-14337	0.198
	PPIAL4H	42520	0.086
	NUDT4P2	89140	0.028
	AC245407.1	-72139	-0.018
	HYDIN2	-85256	-0.03
chr13_19818179_19818680	ST6GALNAC4P1	-189	0.938
	AL355001.1	-23397	0.457
	RN7SL166P	81176	0.305
	AL355001.2	-45428	0.279
	PSPC1	35411	0.245
	ZMYM5	-45219	0.209
chr7_27404235_27404736	AC004009.1	42895	0.938
	AC004009.2	-7678	0.891
	AC004009.3	23924	0.844
	PSMC1P2	-57280	0.841
	EIF4HP1	-54363	0.669
	AC073150.1	-88279	0.597
	HNRNPA1P73	74952	0.282
chr14_53613599_53614289	AL163953.1	-82	0.936
	RPS3AP46	1220	0.607
chr19_1747582_1748531	AC005256.1	0	0.936
	ONECUT3	-5450	0.534
	TCF3	95441	0.232
	AC012615.6	-74033	0.166
	AC005619.1	23941	0.073
	ATP8B3	-64220	0.036
chr10_3809999_3810547	AL513303.1	438	0.935
	KLF6	24992	0.271
	AL450322.1	42358	0.223
	AL450322.2	61307	0.21
	LINC02639	-23677	0.131
chr7_27409446_27409947	AC004009.1	48105	0.935
	AC004009.2	-2468	0.884
	AC004009.3	29134	0.858
	PSMC1P2	-52070	0.814
	EIF4HP1	-49153	0.639
	AC073150.1	-83069	0.596
	HNRNPA1P73	80162	0.241
chr14_71848540_71849041	AC005993.1	184	0.934
	RGS6	-83639	0.712
chr12_120965669_120966170	HNF1A-AS1	-15045	0.933
	HNF1A	-12623	0.594
	OASL2P	-93750	0.088
	RPL12P33	49175	0.084
	CLIC1P1	51520	0.076
	AC069214.1	61218	0.052
	OASL	-73322	0.049
	C12orf43	-50582	-0.005
	SPPL3	61562	-0.091
chr1_222754514_222755015	FAM177B	17557	0.931
	AL392172.2	-18385	0.866
	AL392172.1	-60258	0.559
	AC093152.1	-60300	0.321
	AL592148.3	93252	0.298
	BROX	42211	0.053
	AIDA	41554	-0.117
chr3_37987663_37988164	VILL	-145	0.931
	DLEC1	-51291	0.269
	PLCD1	-41848	0.251
	AC144536.1	-26654	0.24
	MIR26A1	18510	0.208
	PPP2R2DP1	-63845	0.054
chr14_106872578_106873343	IGHV4-80	-226	0.931
	IGHV7-81	-2111	0.717
	IGHVII-78-1	7065	0.667
	IGHV3-79	4868	0.622
	IGHVIII-82	-6852	0.29
	IGHV5-78	21543	0.082
	IGHV3-74	61829	0.017
	IGHV3-73	69727	0.015
	IGHV3-71	97342	0.014
	IGHV3-72	81727	-0.086
chr1_149848599_149849100	H2BC20P	-2087	0.93
	H2BC19P	5975	0.759
	FCGR1A	66179	0.353
	AC243772.2	55830	0.336
	H2BC21	-37802	0.279
	SF3B4	-78953	0.223
	MTMR11	-88029	0.214
	H2BC18	36477	0.165
	H2AC19	-2211	0.134
	H4C14	16191	0.123
	SV2A	-68994	0.115
	H3C15	-3769	0.112
	H2AC20	-38125	0.06
	H2AC18	6114	0.048
	H4C15	-12360	0.046
	H2AC21	-39163	0.027
	AC243772.1	94140	0.022
	AC239868.1	-12421	0.02
	BOLA1	-39040	0.009
	H3C14	7657	0.005
	H3C13	35169	-0.088
chr2_88016233_88017087	RNU2-63P	113	0.93
	AC108479.3	-120	0.319
	AC108479.2	23802	0.137
	KRCC1	-47592	0.082
	SMYD1	-51165	0.075
	MIR4780	-65939	0.038
	NDUFB4P7	48051	0.011
	AC108479.1	44004	-0.009
chr12_91876989_91877851	LINC02404	496	0.929
	AC090049.1	-24038	0.044
	AC090049.2	6190	-0.028
chr17_28233207_28233708	ERVE-1	-1823	0.928
	AC061975.7	14173	0.212
	PYY2	6895	0.206
	PPY2P	-13986	0.082
	AC061975.2	-23211	0.08
	AC061975.8	28842	0.056
	KRT18P55	-84325	0.042
	AC061975.5	-38907	0.033
	AC061975.6	-14548	0.025
	TMEM97	-85742	0.02
	AC061975.1	-32911	0.018
	AC061975.3	-42258	-0.055
chr10_101729753_101730254	AC010789.1	-33	0.927
	AC010789.2	35603	0.702
	NPM3	-53409	0.125
	FGF8	-50365	-0.016
	OGA	-88461	-0.06
	KCNIP2-AS1	-88796	-0.104
	FBXW4	34709	-0.213
chr1_161421945_161422446	AL592295.4	22787	0.927
	AL592295.5	22198	0.615
	AL592295.1	16128	0.575
	AL592295.3	-48327	0.448
	AL831711.1	-18800	0.415
	AL592295.2	10394	0.254
	RRM2P2	42838	0.181
	FCGR2A	-83234	-0.098
	AL590385.2	-90980	-0.113
chr2_85314792_85315293	AC093162.3	1	0.926
	ELMOD3	-39352	0.647
	RN7SL113P	-53240	0.449
	AC062037.1	-52543	0.203
	PEBP1P2	-26796	0.082
	AC062037.3	-72104	0.029
	AC093162.1	52775	0.01
	AC093162.2	-17954	-0.023
	AC062037.2	-45883	-0.032
	RETSAT	-39489	-0.095
	TGOLN2	-13254	-0.117
chr22_22099054_22099555	IGLV8-61	604	0.926
	IGLV6-57	-96495	0.616
	IGLV4-69	68370	0.541
	AC245517.5	11380	0.464
	IGLV10-54	60661	0.457
	IGLV4-60	-62895	0.429
	IGLVI-70	73228	0.358
	PRAMENP	55370	0.241
	IGLV1-62	12743	0.236
	ABHD17AP5	-18701	0.172
	AC245517.1	-3915	0.158
	AC245517.2	-68985	0.141
	IGLVI-56	-99256	0.126
	BMP6P1	-86637	0.111
	AC245517.4	-56278	0.108
	IGLV10-67	55686	0.104
	IGLVIV-65	29079	0.104
	AC245452.3	52874	0.1
	AC245452.4	60661	0.088
	IGLVIV-64	23938	0.077
	AC245452.5	62960	0.063
	SOCS2P2	-72252	0.063
	IGLVI-63	19534	0.042
	IGLVIV-66-1	40871	0.037
	IGLVV-58	-83278	0.036
	IGLVIV-59	-79924	0.035
	IGLVI-68	66559	-0.003
	AC245517.3	-58078	-0.034
	IGLVV-66	38227	-0.096
chr2_113703443_113703944	AC017074.1	-384	0.924
	RABL2A	76465	0.391
	AL078621.2	35073	0.389
	AC017074.2	34528	0.364
	RNU6-744P	22583	0.35
	AL078621.1	45786	0.268
	AL078621.3	95786	0.128
	SLC35F5	-52999	0.12
	RPL23AP7	76604	0.085
	MIR4782	-17674	0.054
chr2_78353305_78353806	AC064872.1	-84294	0.924
	AC012494.1	63087	0.91
	CYCSP6	-59538	0.889
chr4_83084007_83084508	AC073840.1	8301	0.923
	PLAC8	-52817	0.604
	RNU6-615P	80846	0.137
	COPS4	49811	-0.262
	LIN54	71332	-0.353
chr3_184149711_184150212	AC131235.2	258	0.923
	EEF1AKMT4	-99688	0.251
	ALG3	-99586	0.232
	AC131235.4	16401	0.221
	HSP90AA5P	34610	0.202
	AP2M1	-24727	0.153
	AC131235.3	14724	0.125
	HTR3E	52898	0.083
	EIF2B5	14924	0.07
	HTR3C2P	73183	0.044
	AC131235.1	63059	0.021
	HTR3C	96915	0.007
	MIR1224	-91443	-0.006
	DVL3	-5415	-0.017
	HTR3E-AS1	44784	-0.02
	ABCF3	-36061	-0.034
	VWA5B2	-80467	-0.056
chr5_95834539_95835320	AC008592.3	-116	0.92
	GLRX	12204	0.382
	LINC01554	-3315	0.192
	HSPD1P11	65931	0.139
	AC008592.4	-17791	0.129
	AC008592.5	-14379	0.116
	AC008592.1	-26856	0.007
chr12_126030380_126030881	LINC02826	46928	0.919
	LINC00939	46965	0.503
	LINC02359	-63482	-0.045
chr17_50943872_50944373	AC005920.1	-591	0.919
	TOB1	76144	0.468
	TOB1-AS1	77443	0.384
	AC005920.3	18	0.233
	AC005920.2	-98402	0.065
	RPL5P33	96172	-0.049
chr10_86400312_86400943	AL844892.2	-315	0.918
	AL844892.1	-2573	0.469
	GRID1	33833	0.044
	RNU6-780P	-87818	-0.085
chr17_8057599_8058100	AC129492.2	229	0.917
	AC129492.6	-6086	0.523
	PER1	-98656	0.17
	ALOX12B	-29866	0.137
	AC129492.1	-21632	0.045
	AC104581.3	41472	0.006
	MIR4314	-30206	-0.004
	GUCY2D	55235	-0.027
	HES7	-66256	-0.037
	ALOX15B	18816	-0.117
	ALOXE3	-61197	-0.125
chr11_69479788_69480289	LINC02747	-1507	0.917
	LINC01488	-1624	0.181
	AP000439.3	12440	0.124
	AP000439.2	54348	0.105
	AP000439.1	35295	0.102
	AP005233.1	65731	-0.056
chr3_112672179_112672680	LINC02042	-76889	0.917
	AC048334.1	-25276	0.853
	CCDC80	22900	-0.104
chr13_54572260_54572761	AL442636.1	156	0.917
chr2_7725488_7725989	LINC01871	-63	0.916
	AC092580.4	54408	0.416
	AC092580.1	-11357	0.352
	AC092580.2	53492	0.34
	AC092580.3	-10045	0.334
chr22_22818787_22819288	IGLV3-9	28	0.916
	IGLC2	-81938	0.709
	IGLV2-14	60338	0.698
	IGLV2-8	-3620	0.682
	IGLC3	-87304	0.68
	IGLV3-1	-61668	0.669
	IGLV2-11	26547	0.667
	IGLV3-19	98415	0.656
	IGLV3-10	7291	0.618
	IGLL5	-68742	0.617
	IGLJ2	-80443	0.549
	IGLV2-18	84431	0.511
	IGLV2-5	-37724	0.492
	IGLV3-16	71655	0.46
	MIR5571	-67229	0.343
	IGLJ3	-85812	0.313
	IGLV3-12	47214	0.31
	IGLV4-3	-52469	0.297
	IGLV3-6	-31337	0.286
	IGLJ1	-74654	0.268
	IGLV3-13	56744	0.245
	IGLV3-4	-38987	0.22
	IGLC5	-96597	0.178
	IGLJ6	-99094	0.163
	IGLJ4	-91536	0.144
	IGLC4	-91790	0.124
	AC245028.1	4367	0.087
	AC244157.2	31770	0.078
	IGLV3-7	-19564	0.078
	AC245028.3	15962	0.07
	IGLV3-15	63484	0.042
	IGLV3-2	-54174	0.033
	MIR650	-3738	0.022
	IGLJ5	-95199	0.021
	IGLV3-17	80094	0.01
	AC245028.2	-15827	0
	AC244157.1	44509	-0.017
chr1_212558482_212559291	AC092803.1	-845	0.916
	ATF3	-6448	0.399
	FAM71A	-65588	0.345
	AC092803.4	-477	0.229
	AL590648.2	-67885	0.134
	LINC02771	85981	0.118
	AC092803.2	54708	0.034
	LINC01740	13192	0.022
	AL590648.1	-88410	-0.063
chr13_106038791_106039292	AL138701.2	-25027	0.915
chr15_59622209_59622725	GCNT3	27592	0.915
	RNA5SP396	48245	0.365
	AC092755.1	-49835	0.309
	AC092755.2	-66050	0.248
	GTF2A2	-35074	0.239
	AC092754.1	69374	0.206
	PIGHP1	-54290	0.155
	AC092754.2	96586	-0.052
	BNIP2	-67067	-0.165
chr15_52804602_52805103	AC016044.1	-1120	0.915
	RPSAP55	-80743	0.7
	ONECUT1	13774	0.598
	FAM214A	95035	0.041
chr5_18745832_18746333	LINC02100	-91	0.914
chr8_127200582_127201083	CASC19	-26709	0.914
	AC018714.2	-56798	0.294
	AC018714.1	-91401	0.199
chr17_10844399_10844900	AC015908.2	-24	0.914
	TMEM238L	40551	0.521
	RPL15P21	-16812	0.5
	AC015908.4	52591	0.492
	AC015908.3	75561	0.466
	AC015908.1	98107	0.459
	RNU6-1065P	-13354	0.376
	PIRT	6563	0.293
	AC015908.5	22407	0.22
	AC015908.6	6556	0.074
chr12_69330908_69331441	AC020656.2	-708	0.914
	LYZ	-17207	0.416
	C1GALT1P1	46777	0.409
	CPSF6	91605	0.305
	YEATS4	-28536	0.163
	RPS26P45	-91482	0.125
	RN7SL804P	-69729	0.027
chr17_29204326_29204827	TWF1P1	102	0.914
	AC005412.1	6791	0.211
	NUFIP2	-89572	0.079
	CRYBA1	-42287	-0.116
	MYO18A	24164	-0.169
	AC024619.3	64093	-0.287
chr14_22547157_22547658	TRAC	-98	0.913
	TRAJ21	23808	0.633
	TRAJ24	27439	0.614
	TRAJ14	17081	0.612
	TRAJ22	25368	0.609
	TRAJ33	38806	0.594
	TRAJ39	45807	0.592
	TRAJ20	23083	0.592
	TRAJ31	36440	0.581
	TRAJ28	31785	0.574
	TRAJ12	15469	0.572
	TRAJ6	8335	0.562
	TRAJ10	13911	0.558
	TRAJ27	31135	0.557
	TRAJ13	16332	0.552
	TRAJ19	22145	0.551
	TRAJ40	47719	0.547
	TRAJ34	39742	0.546
	TRAJ3	4229	0.545
	TRAJ32	38067	0.541
	TRAJ8	11263	0.541
	TRAJ4	5209	0.541
	TRAJ1	2371	0.538
	TRAJ35	40764	0.534
	TRAJ11	14906	0.532
	TRAJ16	18881	0.529
	TRDC	84476	0.528
	TRAJ5	7161	0.526
	TRAJ38	45177	0.518
	TRAJ29	33469	0.515
	TRAJ36	42298	0.514
	TRAJ30	34556	0.514
	TRAJ23	26992	0.511
	TRAJ26	28962	0.506
	TRAJ45	53483	0.501
	TRAJ42	50521	0.501
	TRAJ17	20564	0.496
	TRAJ9	11854	0.486
	TRAJ7	9786	0.477
	TRAJ52	61180	0.467
	TRAJ37	43658	0.466
	TRAJ2	3337	0.465
	TRAJ46	54005	0.461
	TRAJ44	52587	0.459
	TRAJ18	21758	0.454
	TRAJ48	56917	0.453
	AC244502.1	64449	0.44
	TRAJ51	60225	0.431
	TRAJ25	28596	0.426
	TRAJ41	49751	0.423
	TRAJ50	58815	0.406
	TRAJ43	51495	0.4
	TRAJ49	57920	0.375
	TRAJ56	67887	0.374
	TRAJ54	65121	0.362
	TRAJ57	68536	0.335
	TRAJ47	54557	0.331
	TRAJ53	64404	0.329
	TRAJ60	71102	0.305
	TRAJ58	69701	0.292
	TRDJ3	88310	0.272
	TRAJ55	65711	0.25
	TRDJ1	97319	0.239
	TRDJ2	90719	0.238
	TRAJ59	70855	0.189
	TRDJ4	92159	0.188
	TRDV3	77710	0.154
	TRAJ61	72092	0.15
	DAD1	-41816	0.149
	AC243965.1	-9232	0.109
	TRDD3	98295	0.106
	LINC02332	-9654	0.073
	OR6J1	-96944	0.033
	ABHD4	-50829	0.025
	AC243965.2	-51538	-0.13
chr10_101708029_101708530	AC010789.1	-21757	0.912
	AC010789.2	13879	0.745
	NPM3	-75133	0.104
	RNU6-1165P	85421	0.067
	FGF8	-72089	0.034
	FBXW4	12985	-0.188
chr2_78416448_78416949	AC064872.1	-21152	0.912
	CYCSP6	3604	0.887
chr2_78431217_78431718	AC064872.1	-6382	0.911
	CYCSP6	18374	0.88
chr1_156661252_156661753	AL590666.2	78	0.909
	AL365181.3	16615	0.684
	BCAN	20112	0.578
	AL365181.2	20498	0.562
	RRNAD1	-66940	0.359
	HAPLN2	42171	0.342
	IQGAP3	88898	0.29
	ISG20L2	-67297	0.253
	PRCC	-89108	0.242
	AL590666.1	-51672	0.217
	AL365181.4	46214	0.187
	MRPL24	-80088	0.168
	GPATCH4	60006	0.119
	NAXE	69740	0.076
	AL590666.3	-30495	0.023
	AL590666.4	-28174	0.009
	TTC24	81775	-0.012
	NES	-15905	-0.019
	CRABP2	-44314	-0.154
chr4_9549430_9549931	AC097493.2	-13491	0.909
	AC097493.1	-4305	0.814
	SNRPCP13	-34451	0.745
	AC097493.4	17251	0.722
	MIR548I2	-6636	0.707
	UNC93B7	55944	0.202
	OR7E85P	65962	0.127
	OR7E84P	80706	0.115
	AC097493.3	27770	0.095
	OR7E86P	90425	0.078
	OR7E83P	36775	0.005
chr1_25239688_25240190	AL031432.5	445	0.909
	AL031432.4	7353	0.363
	AL031432.3	-7898	0.359
	RSRP1	-98274	0.353
	AL031432.1	31800	0.183
	SDHDP6	-54704	0.157
	AL031432.2	-27197	0.156
	RHD	-32454	0.073
	AL928711.1	-97526	0.054
	SYF2	7437	-0.138
	TMEM50A	-98378	-0.174
chr6_85660060_85660561	PKMP3	-296	0.909
	RNU4-72P	-91271	0.105
	AL355615.2	-71061	0.087
	AL589666.1	45076	0.065
	SNX14	66154	0.038
	SMIM11P1	-75611	0.03
	SNHG5	-18622	-0.096
	SYNCRIP	16518	-0.144
chr17_49836072_49836573	AC027801.5	2083	0.908
	AC027801.1	-9588	0.676
	TAC4	-11695	0.656
	KAT7	47641	0.44
	FAM117A	47142	0.267
	AC027801.4	-78081	0.191
	AC027801.2	-51276	0.19
	SRP14P3	40979	0.186
chr22_22720256_22720757	IGLV3-19	-117	0.907
	IGLV2-14	-38194	0.782
	IGLV2-23	22717	0.772
	IGLV2-11	-71985	0.771
	IGLV3-21	8817	0.758
	IGLV3-25	33780	0.756
	IGLV3-10	-91241	0.701
	IGLV3-9	-98504	0.661
	IGLV3-27	52218	0.599
	IGLV2-18	-14101	0.584
	IGLV3-16	-26877	0.519
	IGLV2-28	56033	0.412
	IGLV3-22	16241	0.359
	IGLV3-12	-51318	0.352
	IGLV3-24	26067	0.239
	IGLV3-13	-41788	0.208
	AC244157.2	-66762	0.125
	BCRP4	90441	0.117
	AC245028.1	-94165	0.077
	IGLV3-17	-18438	0.057
	IGLVI-20	5216	0.052
	AC244250.1	27194	0.031
	AC245028.3	-82570	0.024
	GGTLC2	76031	0.021
	AC244157.1	-54023	0.02
	AC244250.2	30675	0.014
	IGLVVI-25-1	41409	-0.007
	AC244250.4	86657	-0.009
	IGLV3-29	59207	-0.014
	IGLV3-15	-35048	-0.016
	POM121L1P	76033	-0.02
	IGLV3-26	47354	-0.024
chr4_9539974_9540475	AC097493.2	-22947	0.907
	AC097493.1	-13761	0.845
	SNRPCP13	-43907	0.791
	MIR548I2	-16092	0.699
	AC097493.4	7795	0.695
	UNC93B7	46488	0.201
	DEFB131A	95690	0.186
	OR7E85P	56506	0.136
	OR7E84P	71250	0.133
	AC097493.3	18314	0.082
	OR7E86P	80969	0.051
	OR7E83P	27319	0.016
chr2_78417893_78418394	AC064872.1	-19706	0.907
	CYCSP6	5050	0.869
chr11_67955669_67956170	AC004923.1	118	0.905
	ENPP7P7	82553	0.609
	RPS3AP40	29489	0.593
	LINC02754	69443	0.46
	AC004923.2	20362	0.452
	TCIRG1	-83105	0.448
	ALDH3B1	-52658	0.411
	UNC93B1	-49062	0.376
	RNU6-46P	60289	0.354
	AP002807.1	-94820	0.266
	MIR6753	-88874	0.214
	NDUFS8	-74697	0.116
	AC004923.3	-10307	0.066
	AC004923.4	-74541	0.066
	OR7E1P	-19323	0.046
chr3_100697859_100698360	ADGRG7	88509	0.905
	GMFBP1	32634	0.68
	AC069223.1	51989	0.334
	TFG	-11221	0.229
chr7_27411133_27411634	AC004009.1	49793	0.905
	AC004009.3	30822	0.887
	AC004009.2	-780	0.87
	PSMC1P2	-50382	0.831
	EIF4HP1	-47465	0.667
	AC073150.1	-81381	0.635
	HNRNPA1P73	81850	0.247
chr3_37990455_37990976	VILL	2657	0.904
	DLEC1	-48489	0.383
	PLCD1	-39046	0.256
	MIR26A1	21312	0.218
	AC144536.1	-23852	0.186
	PPP2R2DP1	-61043	0.085
chr1_204377628_204378392	AL606489.1	160	0.904
	PLEKHA6	345	0.789
	LINC00628	8291	0.534
	AL592114.1	30752	0.298
	AL606489.2	-16531	0.002
	PPP1R15B	-33807	-0.016
chr2_164896583_164897109	SLC38A11	-58679	0.904
	AC019197.1	56185	0.596
	RNA5SP111	1069	0.564
	COBLL1	53167	0.384
	RNA5SP110	38414	0.184
chr15_45449842_45450380	AC025580.2	1684	0.903
	HMGN2P46	-61025	0.835
	SLC30A4	-72644	0.625
	AC025580.1	8303	0.527
	SNORA41B	-87139	0.266
	C15orf48	19582	0.246
	GATM	47784	0.238
	AC025580.3	71411	0.189
	RNU6-953P	95226	0.136
	SPATA5L1	47775	0.128
chr1_1162549_1163115	AL390719.2	-6525	0.903
	MIR200B	-4272	0.899
	MIR429	-6173	0.881
	MIR200A	-5031	0.84
	LINC01342	25815	0.768
	C1orf159	46471	0.683
	TTLL10-AS1	-16723	0.653
	TTLL10	-11048	0.547
	SDF4	-69235	0.481
	C1QTNF12	-83890	0.478
	AL162741.1	-88502	0.475
	AL390719.3	65247	0.328
	RNF223	88526	0.268
	B3GALT6	-69405	0.186
	TNFRSF18	-43760	0.114
	TNFRSF4	-51321	0.045
	AL645608.8	99544	-0.009
chr4_9603999_9604502	AC097493.2	41079	0.903
	AC105916.2	-87536	0.814
	AC097493.1	50265	0.768
	ENPP7P11	-73058	0.742
	MIR548I2	47934	0.733
	SNRPCP13	20119	0.686
	AC097493.4	71821	0.683
	FAM86MP	-88245	0.2
	AC097493.3	82340	0.096
	OR7E83P	91345	-0.01
chr8_81689538_81690039	SLC10A5	-5270	0.902
	IMPA1	3457	0.623
	IMPA1P1	58654	0.557
	NIPA2P4	71228	0.431
	RPS26P34	62519	0.405
	SLC10A5P1	54126	0.371
	CHMP4C	-42660	0.341
	AC132219.2	-6580	0.251
	ZFAND1	-43115	-0.034
chr3_100697140_100697696	ADGRG7	87817	0.902
	GMFBP1	31942	0.627
	AC069223.1	51297	0.332
	TFG	-11913	0.204
chr11_70000041_70000542	AP003555.1	-20767	0.899
	LINC02753	-65079	0.88
	LINC02584	-75141	0.847
	AP003555.2	14416	0.768
	ANO1	-78010	0.572
	RNU6-1175P	-75071	0.494
	AP007216.1	89298	0.169
	AP007216.2	73479	-0.005
chr5_75363641_75364142	AC008897.3	132	0.899
	HMGCR	27563	0.304
	AC008897.2	26978	0.204
chr1_109731929_109732430	AL158847.1	6360	0.899
	GSTM4	76081	0.232
	NDUFA5P10	-78818	0.228
	LINC01768	-96175	0.205
	GSTM2	64158	0.203
	RPL7P8	80810	0.182
	EPS8L3	-31847	0.132
	GSTM5	20400	0.099
	GSTM3	-8858	0.077
	AC000032.1	38438	0.073
	GSTM1	44366	0.038
chr5_104118270_104118794	LINC02163	38685	0.898
	RNU1-140P	19658	0.327
chrX_131501489_131501990	AL049734.1	8854	0.897
	OR13H1	-42236	0.886
	OR13K1P	-60989	0.883
	OR1AA1P	77439	0.854
	IGSF1	-77159	0.835
	AL049734.2	64070	0.784
	AL365256.1	-76941	0.683
	OR7L1P	-94381	0.345
chr3_186596848_186597349	AC068631.4	122	0.896
	FETUB	-38871	0.159
	AC068631.2	-33113	0.054
	DNAJB11	29695	0.036
	AHSG	-15962	0.021
	TBCCD1	26555	0.012
	AC109780.1	-90231	-0.06
	HRG	-63118	-0.127
	CRYGS	50396	-0.205
chr4_39135220_39135723	AC079921.2	1559	0.896
	KLHL5	90433	0.55
	AC079921.1	-46786	0.51
	WDR19	-47032	0.361
chr13_106083654_106084276	AL138701.2	19896	0.896
	RNA5SP38	-71525	0.553
chr22_46079954_46080455	MIRLET7BHG	26335	0.895
	PRR34	26060	0.702
	MIR3619	-10840	0.688
	AL121672.3	27111	0.639
	AL121672.1	22044	0.626
	LINC00899	35351	0.593
	BX537318.2	73588	0.501
	FP325332.1	-83099	0.487
	AL121672.2	10313	0.466
	PRR34-AS1	26499	0.332
	BX537318.1	66598	0.295
	PPARA	-70317	0.123
chr2_78417169_78417670	AC064872.1	-20430	0.895
	CYCSP6	4326	0.85
chr13_105991593_105992094	AL138701.2	-72225	0.894
	AL138701.1	94201	0.349
chr4_1151515_1152016	AC092535.2	394	0.894
	RNF212	38202	0.655
	AC092535.4	38127	0.632
	AC092535.1	32882	0.569
	TMED11P	-1960	0.549
	AC092535.5	-16012	0.465
	AC092535.3	50208	0.461
	SPON2	-57196	0.315
	CTBP1-AS	-58354	0.256
	CTBP1	-98187	0.184
	CTBP1-DT	-97534	0.173
chr1_16642928_16643429	CROCCP2	-14054	0.894
	CROCC	-97095	0.718
	NBPF1	29616	0.634
	MST1P2	-2444	0.537
	ESPNP	-76979	0.497
	AL021920.2	-45571	0.202
	AL137798.1	25787	0.191
	RNU1-3	-23770	0.167
	AL021920.1	-58368	0.097
	RNU1-4	-97338	0.049
	AL355149.1	90647	0.041
	AL137798.2	-13701	-0.008
	CROCCP4	-97102	-0.042
	EIF1AXP1	-42877	-0.238
chr10_75276209_75276710	HMGA1P5	-186	0.894
	ZNF503-AS1	32892	0.816
	AC010997.1	-12222	0.802
	COMTD1	40430	0.294
	RPL39P25	6915	0.083
	VDAC2	66306	-0.074
chr7_27361568_27362069	AC004009.1	227	0.893
	AC004009.2	-50346	0.829
	AC004009.3	-18744	0.809
	PSMC1P2	-99948	0.727
	EIF4HP1	-97031	0.607
	HNRNPA1P73	32284	0.236
	RPL35P4	92140	0.101
chr14_100145069_100145581	DEGS2	-14320	0.892
	AL133523.1	-93230	0.033
	MIR151B	35811	-0.065
	YY1	-92973	-0.066
	MIR342	35670	-0.097
	AL157912.1	70447	-0.134
chr2_96321501_96322002	AC021188.1	21	0.892
	ITPRIPL1	-3579	0.305
	SNRNP200	481	-0.014
	NCAPH	-14014	-0.039
	TMEM127	55758	-0.042
	CIAO1	55593	-0.1
chr3_127915142_127915643	KBTBD12	160	0.892
	RNA5SP139	-48216	0.378
	AC117480.1	77956	0.097
chr10_94747826_94748327	CYP2C19	-14605	0.891
	CYP2C18	64347	0.839
	AL583836.1	59922	0.686
chr3_150038807_150039308	AC117386.2	-156	0.891
	TMEM183B	55750	0.196
	PFN2	-11730	0.153
	LINC01998	-41059	0.147
	AC117395.1	62303	0.095
	PPIAP73	54663	0.091
	ANKUB1	70673	0.087
	AC022494.1	-11671	0.064
	HNRNPA1P24	39413	-0.009
	NPM1P29	99259	-0.022
chr7_13376658_13377159	AC011287.2	11859	0.89
chr3_48400812_48401313	FBXW12	28843	0.89
	PLXNB1	-29024	0.53
	ATRIP	-45648	0.437
	AC134772.1	-45594	0.283
	NME6	99377	0.081
	RN7SL321P	21228	0.034
	MIR2115	84603	0.016
	CCDC51	-39394	0.003
	SPINK8	72721	-0.075
	TMA7	-39195	-0.224
chr14_36647062_36647563	AL079303.1	-11489	0.89
	PAX9	-10256	0.688
	NKX2-8	64698	0.4
	RPL29P3	69307	0.201
	RN7SKP257	53165	0.131
chr5_104172729_104173230	LINC02163	93133	0.89
	RN7SL255P	-87846	0.751
	RNU1-140P	74106	0.315
chr7_13422150_13422651	AC011287.2	57351	0.889
chrX_45806545_45807046	LINC02595	-44745	0.889
	MIR222HG	36522	0.744
	AC234772.2	41497	0.551
	MIR222	59672	0.528
	MIR221	60530	0.436
	AC234772.1	76044	0.199
chrX_131572325_131572826	OR13H1	28600	0.889
	AL049734.1	79690	0.886
	OR13K1P	9847	0.883
	IGSF1	-6323	0.809
	AL365256.1	-6105	0.733
	OR7L1P	-23545	0.404
	OR2AF1P	-46437	0.283
	HDGFP1	-74063	0.048
chrX_131565814_131566315	OR13K1P	3335	0.889
	OR13H1	22088	0.865
	AL049734.1	73178	0.826
	IGSF1	-12835	0.812
	AL365256.1	-12617	0.698
	OR7L1P	-30057	0.368
	OR2AF1P	-52949	0.303
	HDGFP1	-80575	0.062
chrX_131552946_131553447	OR13K1P	-9533	0.889
	OR13H1	9220	0.876
	AL049734.1	60310	0.815
	IGSF1	-25703	0.781
	AL365256.1	-25485	0.662
	OR7L1P	-42925	0.374
	OR2AF1P	-65817	0.237
	HDGFP1	-93443	0.021
chrX_45769996_45770497	MIR222HG	-28	0.888
	LINC02595	-81295	0.722
	AC234772.2	4947	0.698
	MIR222	23122	0.689
	MIR221	23980	0.541
	AC234772.1	39494	0.184
chrX_36962984_36963485	BX842568.2	-191	0.888
	BX842568.4	5321	0.664
	BX842568.3	-22859	0.502
	AL592156.1	96545	0.431
	FAM47C	-45163	0.257
chr2_78396973_78397474	AC064872.1	-40626	0.888
	CYCSP6	-15870	0.871
chr5_104178997_104179506	LINC02163	99405	0.888
	RN7SL255P	-81574	0.765
	RNU1-140P	80378	0.333
chr22_22369246_22369747	IGLV7-46	-118	0.887
	IGLV1-47	11757	0.591
	IGLV1-51	47024	0.578
	IGLV5-48	16556	0.438
	IGLV9-49	26309	0.435
	IGLV1-40	-40270	0.349
	IGLV7-43	-25522	0.302
	IGLV1-36	-62462	0.268
	IGLV5-45	-6490	0.212
	AC245060.4	66272	0.202
	IGLV1-41	-34711	0.196
	IGLV1-44	-11270	0.154
	IGLV5-37	-58044	0.106
	AC245291.1	-96163	0.093
	ASH2LP1	-50830	0.087
	IGLV1-50	42196	0.069
	ASH2LP2	3286	0.067
	AC245291.3	-1333	0.065
	IGLV7-35	-80706	0.033
	IGLV5-52	50769	0.024
	AC245060.5	82276	0.023
	ASH2LP3	29923	0
	IGLVVII-41-1	-29353	0
	AC245060.1	21689	-0.015
	AC245060.7	71372	-0.137
	AC245060.2	75763	-0.244
chr11_3476895_3477396	AC127526.5	81	0.887
	RPS3AP39	-73373	0.713
	RPS24P14	-82511	0.658
	AC127526.1	7827	0.577
	SNRPCP5	-54274	0.558
	AC127526.4	-34413	0.552
	AC127526.3	-23475	0.372
	ZNF195	97924	0.162
	OR7E12P	85394	0.056
	FAM86GP	54650	-0.009
	TSSC2	96185	-0.045
chr4_157824060_157824561	AC093817.2	54	0.886
	AC017037.1	9300	0.777
	AC017037.3	5738	0.726
	AC104787.1	56197	0.589
	AC017037.5	-55592	0.032
chr6_143573927_143574428	PHACTR2-AS1	12147	0.886
	AL031320.2	89199	0.489
	VDAC1P8	83754	0.444
	PHACTR2	37333	0.362
	FUCA2	62458	0.11
chr9_6715976_6716549	AL354707.1	105	0.885
	PRELID3BP11	-18814	0.467
	KDM4C	-4601	0.381
	LINC02851	11992	0.115
	RPL23AP57	77123	0.065
	SNRPEP2	-32719	0.038
	RN7SL123P	54611	0.034
	AL354707.2	40978	0.009
	AL162411.1	70306	-0.043
	RPS3AP54	53838	-0.064
	RNF2P1	46254	-0.093
	GLDC	70479	-0.139
chr2_108267888_108268416	WASF1P1	-8660	0.885
	SULT1C3	20957	0.861
	LINC01594	50266	0.848
	SETD6P1	41821	0.797
	SULT1C2P2	-49573	0.582
	SULT1C2P1	-54086	0.569
	SULT1C2	-20487	0.567
	GMCL1P2	-98964	0.317
chr15_90293307_90293880	GOLGA2P8	1632	0.885
	AC091167.6	27277	0.67
	ZNF774	-58690	0.537
	AC018946.2	-53993	0.486
	CIB1	59547	0.438
	GDPGP1	59786	0.406
	NDUFA3P4	-92220	0.242
	RN7SL736P	-345	0.18
	RPS12P26	87022	0.179
	AC091167.7	59394	0.153
	TTLL13P	44064	0.144
	AC091167.2	44038	0.062
	AC091167.4	8014	0.015
	AC091167.3	11563	-0.032
	IQGAP1	-94648	-0.036
	AC091167.5	11736	-0.058
	NGRN	27935	-0.08
chr7_27364399_27364900	AC004009.1	3059	0.885
	AC004009.2	-47514	0.856
	AC004009.3	-15912	0.833
	PSMC1P2	-97116	0.806
	EIF4HP1	-94199	0.673
	HNRNPA1P73	35116	0.273
	RPL35P4	94972	0.082
chr9_41654302_41654803	AL591926.3	-42	0.884
	FAM242F	-44520	0.441
	AL591926.8	9781	0.385
	AL591926.1	-46144	0.296
	AL591926.6	-17854	0.234
	AL591926.5	-46130	0.18
	AL591926.7	6517	0.161
	RN7SL565P	75649	0.032
	AL591926.4	81099	-0.005
	AL591926.2	80946	-0.04
chr8_144049088_144049589	SMPD5	259	0.883
	SPATC1	37058	0.735
	MROH1	-98678	0.669
	OPLAH	-14627	0.667
	WDR97	-58388	0.65
	PARP10	36566	0.559
	SHARPIN	-58786	0.459
	AC109322.1	-29927	0.432
	PLEC	72604	0.382
	TSSK5P	-94326	0.35
	HGH1	-88436	0.338
	GPAA1	-33252	0.191
	MIR6846	-8042	0.175
	GRINA	59282	0.152
	EXOSC4	-29310	0.122
	MAF1	-55123	-0.004
	CYC1	-45701	-0.032
chr5_139502977_139503478	AC010378.2	-14	0.883
	NCOA4P4	8972	0.203
	SPATA24	99140	0.133
	AC138517.1	10690	0.122
	SMIM33	32450	0.11
	AC010378.1	-51773	-0.005
	UBE2D2	-23203	-0.006
	STING1	20293	-0.015
	AC142391.1	40521	-0.024
	RNU5B-4P	55321	-0.04
	DNAJC18	58737	-0.069
	ECSCR	40485	-0.07
chr8_37591094_37591595	AC124067.4	-8514	0.883
	AC124067.3	31352	0.84
	AC124067.2	69897	0.653
	LINC01605	37161	0.34
	AC137579.2	-34529	0.301
	AC137579.1	-83043	0.068
	RNU6-607P	-77554	0.001
chr7_46972139_46972640	AC004870.2	2746	0.883
	MRPL42P4	-54180	0.281
	AC004870.1	-80403	0.176
	AC004870.4	-77288	0.133
chr5_157026983_157027484	HAVCR1	-31885	0.882
	TIMD4	64008	0.432
	AC011377.1	-77554	0
chr1_204493856_204494949	PIK3C2B	-322	0.882
	MDM4	-21977	0.27
	AL512306.1	-35290	0.248
	RNA5SP74	-68119	0.215
	AL606489.2	99861	-0.027
	PPP1R15B	82585	-0.077
chr21_29181987_29182488	AF124730.2	-5557	0.882
	AF124730.1	1599	0.489
	GAPDHP14	-40083	0.31
	BACH1	-11833	0.307
	LINC00189	-11242	0.231
	RPL12P9	54050	0.115
	AF129075.1	42854	0.083
chr3_112664869_112665370	LINC02042	-84199	0.882
	AC048334.1	-32586	0.844
	CCDC80	15590	-0.102
chr22_22161847_22162348	IGLV4-60	-101	0.882
	IGLV6-57	-33701	0.486
	IGLV8-61	63398	0.441
	AC245517.5	74174	0.32
	IGLV1-62	75537	0.28
	IGLV11-55	-39565	0.223
	ABHD17AP5	44093	0.218
	BMP6P1	-23843	0.19
	AC245517.2	-6191	0.186
	VPREB1	-82682	0.178
	IGLVV-58	-20484	0.165
	TOP3BP1	-62468	0.16
	IGLVIV-65	91873	0.131
	IGLVI-56	-36462	0.118
	SOCS2P2	-9458	0.116
	AC245517.1	58879	0.11
	IGLVIV-64	86732	0.09
	AC245517.4	6516	0.088
	IGLVI-63	82328	0.061
	IGLVIV-59	-17130	0.059
	AC245517.3	4716	0.056
	IGLVIV-53	-57549	-0.056
	AC245060.3	-68371	-0.099
chr6_42093907_42094408	AL512274.1	-101	0.881
	C6orf132	-48462	0.628
	CCND3	43801	0.144
	TAF8	43645	0.137
	GUCA1A	-61248	0.092
	AL513008.1	64105	0.073
	RNU6-761P	75644	-0.003
	GUCA1A	-61248	-0.052
chr10_120996393_120997006	AC010998.3	11104	0.881
	AC010998.1	16000	0.451
chr11_70034780_70035281	LINC02584	-40403	0.88
	AP003555.1	13971	0.867
	LINC02753	-30341	0.853
	AP003555.2	49154	0.835
	ANO1	-43272	0.606
	AP000879.2	-94267	0.594
	RNU6-1175P	-40333	0.47
chr6_26232931_26233432	H2AC9P	60	0.88
	AL353759.1	60380	0.405
	AL031777.2	33889	0.392
	AL031777.1	31026	0.389
	LARP1P1	69110	0.343
	H1-12P	37628	0.253
	H2AC10P	-39519	0.237
	H3C5P	14137	0.223
	H1-3	-1751	0.217
	H4C7	-13795	0.184
	H2BC8	16490	0.106
	H4C6	-7244	0.09
	H2BC7	33662	0.048
	H2BC5	75036	0.046
	H3C6	8983	0.035
	H2BC6	61123	0.027
	H2AC7	33939	0.026
	H2BC9	-18469	0.025
	H3C8	-38633	0.022
	H1-4	76828	0.019
	AL021917.1	-98718	0.01
	H4C8	-52456	-0.019
	H2BC10	-39794	-0.024
	H3C7	-17423	-0.041
	H3C9P	-89110	-0.042
	H2AC8	16207	-0.061
	H4C5	28630	-0.122
	H4C4	44106	-0.189
chr10_100969297_100969798	SEMA4G	30	0.88
	KAZALD1	-92293	0.61
	AL133215.2	-91457	0.427
	MIR608	-5437	0.347
	AL133215.1	-16066	0.295
	PDZD7	-62747	0.274
	AL133215.3	1860	0.254
	SFXN3	-61686	0.249
	MRPL43	-17967	0.209
	LZTS2	-27070	0.173
	AL138762.1	62268	0.037
	AL138762.2	56809	0.029
	TWNK	-17819	-0.07
	SLF2	56585	-0.13
chr6_71388782_71389283	AL136164.3	-1797	0.88
	LINC00472	-31713	0.842
	AL589935.1	60804	0.695
	MIR30A	-14589	0.529
	AL136164.1	60090	0.519
	AL136164.2	-28404	0.137
	LINC01626	-61802	0.049
chr3_112688789_112689290	LINC02042	-60279	0.88
	AC048334.1	-8666	0.858
	CCDC80	39510	-0.104
chr7_27372315_27372816	AC004009.1	10975	0.88
	AC004009.3	-7996	0.85
	AC004009.2	-39598	0.834
	PSMC1P2	-89200	0.77
	EIF4HP1	-86283	0.628
	HNRNPA1P73	43032	0.263
chr2_117556684_117557185	AC064856.1	20547	0.88
chr7_13414461_13414962	AC011287.2	49663	0.879
chr9_11026544_11027045	AKAP8P1	15046	0.879
	AL162413.1	78313	0.699
chr7_27419790_27420291	AC004009.1	58449	0.879
	AC004009.2	7876	0.84
	AC004009.3	39478	0.812
	PSMC1P2	-41726	0.802
	EIF4HP1	-38809	0.652
	AC073150.1	-72725	0.599
	HNRNPA1P73	90506	0.267
chr13_106103938_106104439	AL138701.2	40119	0.879
	RNA5SP38	-51302	0.533
chr3_112699493_112699995	LINC02042	-49575	0.877
	AC048334.1	2038	0.841
	CCDC80	50214	-0.096
chr2_219402856_219403357	AC053503.1	14610	0.876
	DNPEP	3084	0.282
	SPEGNB	-93019	0.201
	AC053503.2	44123	0.128
	AC053503.4	-95140	0.098
	RESP18	69929	0.082
	PTPRN	93458	0.054
	GMPPA	-95761	0.046
	AC053503.3	-23078	-0.011
	AC053503.5	-24371	-0.021
	DES	-15271	-0.027
	SPEG	-31737	-0.115
chr2_108270736_108271409	WASF1P1	-5740	0.876
	SULT1C3	23877	0.837
	LINC01594	53186	0.835
	SETD6P1	44741	0.796
	SULT1C2P1	-51166	0.61
	SULT1C2	-17567	0.605
	SULT1C2P2	-46653	0.588
	GMCL1P2	-96044	0.256
chr1_60640089_60640590	LINC01748	-167	0.876
chr4_9595600_9596163	AC097493.1	41897	0.876
	AC105916.2	-95904	0.864
	AC097493.2	32711	0.784
	SNRPCP13	11751	0.741
	MIR548I2	39566	0.632
	ENPP7P11	-81426	0.594
	AC097493.4	63453	0.439
	FAM86MP	-96613	0.119
	AC097493.3	73972	0.118
	OR7E83P	82977	0.053
chr2_112864079_112864580	AC079753.1	24002	0.875
	XIAPP3	11002	0.822
	IL1B	27514	0.418
	AC079753.2	39873	0.136
	IL37	-48641	0.077
	CDK8P2	-68295	0.073
	IL1A	79837	-0.087
	CKAP2L	99666	-0.197
chr7_157282194_157282695	AC004975.2	-242	0.875
	DNAJB6	-52937	0.271
	RPS27AP12	90076	0.247
	AC004975.1	19215	0.121
	AC004898.1	83933	0.035
chr10_120989937_120990438	AC010998.3	4592	0.875
	AC010998.1	9488	0.507
chr2_108280452_108281072	WASF1P1	3950	0.873
	LINC01594	62876	0.861
	SULT1C3	33567	0.837
	SETD6P1	54431	0.798
	SULT1C2P1	-41476	0.563
	SULT1C2	-7877	0.543
	SULT1C2P2	-36963	0.531
	GMCL1P2	-86354	0.291
	SULT1C4	-97149	0.122
chr7_93601347_93601848	GNGT1	10025	0.873
	AC002075.2	-68479	0.842
	CALCR	26868	0.631
chr13_106090313_106090814	AL138701.2	26495	0.873
	RNA5SP38	-64926	0.476
chr6_3906454_3906955	AL590004.3	-5275	0.872
	AL391422.2	74768	0.456
	AL138831.3	-75969	0.16
	GLRX3P2	-71358	0.116
	AL590004.2	-7588	0.096
	FAM50B	57331	0.091
	AL391422.3	74771	0.03
	TDGF1P4	-34578	-0.028
	AL590004.1	-15143	-0.048
chr1_235104166_235104937	AL732292.2	-57	0.872
	SNORA14B	-23385	0.406
	RBM34	-56731	0.381
	LINC01348	30332	0.23
	MIR4753	-85564	0.222
	AL732292.1	7140	0.201
	TOMM20	-24285	0.014
chr6_8157798_8158309	AL355499.2	-108	0.872
	AL355499.1	55343	0.568
	BLOC1S5	93658	0.207
	EEF1E1	55495	0.114
	EEF1E1-BLOC1S5	55524	0.039
	BLOC1S5-TXNDC5	93690	-0.086
chr2_117555216_117555717	AC064856.1	19079	0.872
chr19_21569062_21569659	AC123912.1	123	0.871
	AC123912.4	-17962	0.456
	BNIP3P26	47464	0.428
	ZNF429	72678	0.399
	AC123912.2	-25268	0.3
	LINC00664	85986	0.296
	AC123912.3	-68614	0.216
	AC123912.5	-65815	0.086
chr14_37566705_37567482	AL121790.2	-1	0.871
	FOXA1	-28965	0.622
	AL121790.1	3047	0.588
	TTC6	-28753	0.49
chr6_143586475_143586976	PHACTR2-AS1	24695	0.871
	VDAC1P8	96302	0.396
	PHACTR2	49881	0.346
	FUCA2	75006	0.086
chr4_119314286_119314813	FABP2	-7588	0.87
	C4orf3	10105	0.159
	AC110373.1	-80785	0.105
	RNU4-33P	-53012	0.073
	KLHL2P1	-19779	-0.01
	AC093752.3	-94783	-0.056
chr13_112965073_112965574	AL356740.1	-807	0.87
	MCF2L-AS1	-3500	0.476
	MCF2L	70946	0.35
	AL356740.2	-43454	0.331
	AL356740.3	-44347	0.266
chr12_89542904_89543476	POC1B-AS1	18596	0.87
	AC025034.1	-17939	0.568
	CENPCP1	43097	0.495
	POC1B	17143	0.401
	POC1B-GALNT4	16928	0.364
	GALNT4	18394	0.066
chr7_27420673_27421174	AC004009.1	59333	0.87
	AC004009.2	8760	0.844
	PSMC1P2	-40842	0.823
	AC004009.3	40362	0.79
	EIF4HP1	-37925	0.677
	AC073150.1	-71841	0.634
	HNRNPA1P73	91390	0.278
chr22_46078598_46079099	MIRLET7BHG	24979	0.869
	MIR3619	-12196	0.742
	PRR34	24704	0.735
	AL121672.1	20688	0.678
	AL121672.3	25755	0.662
	LINC00899	33995	0.587
	FP325332.1	-84455	0.566
	AL121672.2	8957	0.541
	BX537318.2	72232	0.459
	PRR34-AS1	25143	0.38
	BX537318.1	65242	0.307
	PPARA	-71673	0.173
chr17_48646513_48647014	AC103702.2	-259	0.869
	MIR196A1	14205	0.728
	HOXB-AS4	18089	0.692
	LINC02086	-159	0.612
	HOXB6	41772	0.596
	HOXB5	52803	0.542
	HOXB9	20406	0.541
	HOXB-AS3	97134	0.53
	AC103702.1	64505	0.498
	HOXB3	41852	0.453
	HOXB8	31472	0.44
	RPL9P28	-44930	0.394
	HOXB13	-82414	0.354
	HOXB-AS2	89502	0.341
	HOXB7	13192	0.329
	HOXB4	68414	0.319
	AC091179.2	-43860	0.241
	PRAC2	-76421	0.224
	AC091179.1	-86327	0.214
	PRAC1	-75754	0.134
	COX6B1P2	-66966	0.118
	AC091179.4	-76928	-0.019
chr1_23217275_23217776	HTR1D	22797	0.869
	LUZP1	39718	0.454
	AL161672.1	77201	0.319
	RNU6-514P	54822	0.144
	RNU6-135P	53573	0.081
	AL109936.2	-27239	0.058
	AL109936.8	-80271	0.01
	LINC01355	-69962	0.003
chr3_112693241_112693742	LINC02042	-55827	0.869
	AC048334.1	-4214	0.831
	CCDC80	43962	-0.112
chr8_37594423_37594924	AC124067.4	-5184	0.869
	AC124067.3	34682	0.806
	AC124067.2	73227	0.629
	LINC01605	40491	0.352
	AC137579.2	-31199	0.327
	AC137579.1	-79713	0.069
	RNU6-607P	-74224	0.029
chr16_19389176_19389677	AC130456.7	-4042	0.868
	AC130456.2	-12267	0.865
	LINC02858	55415	0.788
	AC130456.1	74262	0.675
	AC130456.3	-98473	0.593
	AC130456.4	-22236	0.544
	TMC5	-21070	0.535
chr4_9577786_9578287	AC097493.2	14865	0.868
	AC097493.1	24051	0.848
	SNRPCP13	-6095	0.819
	ENPP7P11	-99272	0.74
	AC097493.4	45607	0.697
	MIR548I2	21720	0.669
	UNC93B7	84300	0.21
	OR7E85P	94318	0.161
	AC097493.3	56126	0.079
	OR7E83P	65131	0.029
chr7_27376053_27376554	AC004009.2	-35860	0.868
	AC004009.1	14713	0.865
	PSMC1P2	-85462	0.804
	AC004009.3	-4258	0.795
	EIF4HP1	-82545	0.694
	HNRNPA1P73	46770	0.264
chr17_35404065_35404566	AC060766.4	-57	0.867
	AC060766.7	-5452	0.661
	SLFN12	-28967	0.628
	AC060766.1	-5912	0.514
	AC060766.6	1310	0.377
	SLFN13	-44521	0.314
	AC060766.5	-3502	0.301
	SLFN11	30615	0.285
	AC015911.8	-66312	0.235
	AC060766.3	26638	0.187
	AC015911.7	-93902	0.172
	E2F3P1	-85693	0.169
	AC015911.4	-56234	0.152
	AC022706.1	90837	0.151
	AC015911.5	-73678	0.149
	AC060766.2	60085	0.135
chr15_45476360_45476861	AC025580.2	28183	0.867
	HMGN2P46	-34526	0.817
	SLC30A4	-46145	0.695
	AC025580.1	34802	0.517
	SNORA41B	-60640	0.381
	AC090527.2	-81988	0.287
	GATM	74283	0.278
	C15orf48	46081	0.245
	AC025580.3	97910	0.182
	DPPA5P2	-90166	0.1
	SPATA5L1	74274	-0.065
chr11_70067826_70068327	LINC02753	2705	0.866
	LINC02584	-7357	0.838
	AP003555.1	47017	0.795
	AP003555.2	82200	0.73
	ANO1	-10226	0.601
	AP000879.2	-61221	0.595
	RNU6-1175P	-7287	0.451
chr3_27632806_27633335	AC098614.3	94	0.865
	LINC02084	-79840	0.102
	AC098614.2	-70498	0.079
	AC098614.1	8614	0.039
	EOMES	-89641	-0.019
	AC137675.2	85212	-0.084
chr1_155648455_155648956	AL353807.3	-11539	0.864
	AL353807.5	11102	0.412
	ASH1L-AS1	86664	0.326
	MSTO2P	-97123	0.3
	MSTO1	38518	0.25
	DAP3P1	62062	0.149
	AL353807.1	57444	0.128
	AL353807.2	38326	0.079
	YY1AP1	-40294	0.066
	ASH1L	85899	0.049
	DAP3	-39254	-0.011
	AL353807.4	82400	-0.024
	AL162734.1	-61857	-0.097
chr11_3498251_3498752	AC127526.2	-82709	0.863
	RPS3AP39	-52017	0.78
	AC127526.4	-13057	0.776
	RPS24P14	-61155	0.768
	AC127526.1	29183	0.73
	SNRPCP5	-32918	0.673
	AC127526.5	21437	0.656
	AC127526.3	-2119	0.428
	AP006294.1	-93113	0.19
	FAM86GP	76006	-0.02
chr11_8671684_8672185	TRIM66	-10760	0.863
	AC091053.2	-7155	0.534
	AC026894.3	-96844	0.364
	STK33	77645	0.157
	SNORA3B	-13505	0.092
	RPL27A	-10854	-0.347
chr17_32127307_32127917	AC116407.2	17	0.863
	RHOT1	-14842	0.261
	ARGFXP2	-23892	0.23
	AC116407.4	-31699	0.19
	AC090616.2	44433	0.175
	AC090616.5	32679	0.162
	AC090616.1	13487	0.156
	AC090616.6	76582	0.121
	SH3GL1P1	87638	0.12
	AC116407.3	-52462	0.095
	AC116407.1	-15523	0.077
	WDR45BP1	15022	0.001
chr10_101725820_101726399	AC010789.1	-3927	0.863
	AC010789.2	31709	0.761
	NPM3	-57303	0.066
	FGF8	-54259	0.056
	OGA	-92355	0.002
	KCNIP2-AS1	-92690	0.001
	FBXW4	30815	-0.168
chr7_106779723_106780349	LINC02577	5081	0.863
	AC004917.1	9829	0.31
	PIK3CG	-85242	0.198
chr5_181281240_181281741	AC008443.3	115	0.862
	AC008443.7	-10183	0.523
	RNU6-705P	-20477	0.499
	AC138035.1	-25012	0.372
	AC008443.1	34983	0.306
	TRIM41	58991	0.225
	TRIM52	20351	0.219
	AC008443.6	85994	0.063
	LINC01962	89638	0.061
	AC008443.8	4642	-0.022
	AC008443.5	89615	-0.031
	AC008443.9	63626	-0.034
	AC138035.3	-50349	-0.047
	AC008443.4	75370	-0.051
	AC138035.2	-47751	-0.063
	TRIM52-AS1	20321	-0.068
	TRIM7	76197	-0.101
	RACK1	33394	-0.254
chr2_95834603_95835104	LINC00342	-149	0.862
	GPAT2P1	45200	0.157
chr1_159910325_159910834	AL590560.4	26	0.862
	AL590560.5	10105	0.538
	CFAP45	10415	0.27
	MIR4259	10501	0.228
	VSIG8	47923	0.207
	AL590560.3	55710	0.186
	TAGLN2	-15152	0.138
	AL590560.2	37527	0.109
	AL513485.1	-63484	0.085
	SLAMF9	-43657	0.065
	IGSF9	-35033	0.05
	AL590560.1	58608	0.044
	LINC01133	-47455	0.021
	SLAMF8	83769	-0.03
chr2_169768485_169768986	PTCHD3P2	-63	0.862
	AC009967.2	-21357	0.18
	KLHL23	74248	0.066
	CCDC173	74331	0.024
	PHOSPHO2	74282	0.01
	AC009967.1	40864	0.006
	SSB	-23197	-0.162
	UBR3	-58718	-0.169
	METTL5	-56195	-0.208
chr2_9107475_9107976	AC093904.4	1133	0.862
	AC093904.2	4286	0.751
	AC093904.3	-2731	0.427
	ASAP2	-99039	0.347
	HMGB1P25	88827	0.025
	AC093904.1	-35440	0.004
	RPL30P3	25999	-0.031
chr6_71375608_71376109	LINC00472	-44887	0.861
	AL136164.3	-14971	0.837
	AL589935.1	47630	0.643
	MIR30A	-27763	0.548
	AL136164.1	46916	0.475
	OGFRL1	87047	0.295
	AL136164.2	-41578	0.1
	LINC01626	-74976	0.02
chr2_108266228_108266752	SULT1C3	19295	0.861
	WASF1P1	-10322	0.837
	LINC01594	48604	0.814
	SETD6P1	40159	0.771
	SULT1C2P2	-51235	0.542
	SULT1C2	-22149	0.521
	SULT1C2P1	-55748	0.515
chr2_102540767_102541311	SLC9A4	67813	0.86
	SLC9A2	-78514	0.776
chr3_112734705_112735206	LINC02042	-14363	0.86
	AC048334.1	37250	0.843
	CD200R1L-AS1	-67522	0.814
	CCDC80	85426	-0.114
chr17_81396528_81397029	AC110285.6	-366	0.86
	AC110285.2	6459	0.514
	AC027601.6	50812	0.418
	BAHCC1	1303	0.372
	AC110285.3	34506	0.305
	MIR3186	-54410	0.305
	AC110285.1	11314	0.303
	AC027601.1	66104	0.296
	LINC00482	87530	0.25
	AC110285.5	9363	0.226
	MIR4740	-4000	0.17
	LINC01971	-84792	0.117
chr10_26675415_26675916	SELENOOLP	-21629	0.86
	FAM238B	27680	0.644
	AL390961.1	32438	0.531
	AL160287.1	53328	0.206
	FAM238A	85801	0.204
	PDSS1	-22035	0.076
	HSPA8P3	-38956	0.071
	AL390961.3	-21959	0.047
	AL390961.2	-41969	0.029
chr8_37599695_37600196	AC124067.4	88	0.86
	AC124067.3	39954	0.768
	AC124067.2	78499	0.63
	ZNF703	-95836	0.487
	LINC01605	45763	0.37
	AC137579.2	-25927	0.292
	AC137579.1	-74441	0.085
	RNU6-607P	-68952	0.033
chr7_27423252_27423753	PSMC1P2	-38264	0.86
	AC004009.2	11338	0.835
	AC004009.1	61911	0.825
	AC004009.3	42940	0.805
	EIF4HP1	-35347	0.746
	AC073150.1	-69263	0.706
	HNRNPA1P73	93968	0.287
chr22_21657322_21658148	AP000553.5	-76	0.859
	AP000553.1	5465	0.495
	PPIL2	-8274	0.352
	CCDC116	25019	0.35
	YDJC	27671	0.345
	AP000553.7	-3858	0.24
	AP000553.6	-3560	0.229
	AP000553.2	-4199	0.228
	YPEL1	-78059	0.18
	AP000553.9	-55026	0.174
	MIR130B	4431	0.149
	MIR301B	4754	0.109
	AP000553.8	-86373	0.098
	AP000553.3	16891	0.095
	RN7SL280P	-65447	0.088
	AP000553.4	-4194	0.076
	SDF2L1	15433	0.029
chr10_101709922_101710423	AC010789.1	-19865	0.859
	AC010789.2	15771	0.783
	FGF8	-70197	0.04
	NPM3	-73241	0.029
	RNU6-1165P	87313	0.023
	FBXW4	14877	-0.168
chr13_51923924_51924425	CTAGE3P	13553	0.858
	ATP7B	-87951	0.823
	AL162377.2	2923	0.808
	CCDC70	62193	0.741
	FABP5P2	-42568	0.704
	TMEM272	78997	0.665
	AL162377.3	79015	0.318
	ALG11	-88224	0.283
chr6_71395982_71396483	LINC00472	-24513	0.858
	AL136164.3	5403	0.816
	AL589935.1	68004	0.66
	MIR30A	-7389	0.494
	AL136164.1	67290	0.488
	AL136164.2	-21204	0.117
	LINC01626	-54602	0.076
chr17_57995340_57995841	AC015813.1	740	0.858
	AC015845.1	83257	0.442
	AC015813.5	-11084	0.373
	AC015813.7	7410	0.306
	CUEDC1	40178	0.297
	AC015813.2	-11656	0.187
	AC015813.4	39625	0.143
	VEZF1	7331	0.099
	AC015813.3	-87614	0.049
	AC015813.8	-65149	0.028
	SRSF1	-11756	0.006
	DYNLL2	-87829	-0.053
chr7_1466618_1467119	AC102953.2	-654	0.858
	INTS1	-37521	0.558
	MAFK	-63834	0.543
	AC102953.1	6931	0.468
	MICALL2	7398	0.432
	TMEM184A	-93953	0.297
	AC093734.1	-42559	0.268
chr18_39800071_39800572	MIR924HG	0	0.858
	LINC01902	-41387	0.228
chr13_106095855_106096367	AL138701.2	32042	0.858
[truncated: 27,072 more rows]
